# Supplementary material for: Oxidative stress and protein damage responses mediate artemisinin resistance in malaria parasites
Source: PLOS journal article supplement (doi:10.1371/journal.ppat.1006930), 2018-03-14
Supplement: S10 (10.1371/journal.ppat.1006930.s010) [file journal.ppat.1006930.s010]

Table A

| UPREGULATED PATHWAYS                     |      |                                                                                                   | p-val | FDR q-val |
|------------------------------------------|------|---------------------------------------------------------------------------------------------------|-------|-----------|
| Protein Turnover                         | MPM: | PROTEASOME-MEDIATED DEGRADATION OF NON-NATIVE ER PROTEINS                                         | 0.00  | 0.05      |
|                                          | MPM: | GENES CODING FOR COMPONENTS OF THE PROTEASOME DEGRADATION MACHINERY AND THEIR TIMED TRANSCRIPTION | 0.02  | 0.12      |
|                                          | MPM: | PEPTIDASES AND PROTEASES                                                                          | 0.02  | 0.12      |
|                                          | MPM: | PROTEASOME-MEDIATED PROTEOLYSIS OF UBIQUINATED PROTEINS                                           | 0.03  | 0.21      |
|                                          | GO:  | RESPONSE TO HEAT                                                                                  | 0.02  | 0.16      |
|                                          | GO:  | UBIQUITIN-DEPENDENT PROTEIN CATABOLIC PROCESS                                                     | 0.03  | 0.23      |
|                                          | GO:  | ER-ASSOCIATED PROTEIN CATABOLIC PROCESS                                                           | 0.01  | 0.13      |
| Oxidative Stress                         | MPM: | S-GLUTATHIONYLATED PROTEINS                                                                       | 0.00  | 0.04      |
|                                          | MPM: | PROTEINS TARGETED BY THE THIOREDOXIN SUPERFAMILY ENZYMES                                          | 0.03  | 0.17      |
|                                          | GO:  | OXIDOREDUCTASE ACTIVITY                                                                           | 0.00  | 0.04      |
| Transport                                | MPM: | GENES CODING FOR PROTEIN TRAFFIC RELATED PROTEINS                                                 | 0.00  | 0.04      |
|                                          | MPM: | CLASSICAL COPII-MEDIATED VESICULAR TRANSPORT                                                      | 0.01  | 0.13      |
|                                          | MPM: | SUBCELLULAR LOCATION OF ADAPTOR PROTEINS                                                          | 0.01  | 0.13      |
|                                          | MPM: | GENES CODING FOR TRANSPORT PROTEINS                                                               | 0.02  | 0.16      |
|                                          | MPM: | CLASSICAL CLATHRIN-MEDIATED VESICULAR TRANSPORT                                                   | 0.04  | 0.21      |
|                                          | GO:  | PROTEIN TRANSPORTER ACTIVITY                                                                      | 0.00  | 0.06      |
|                                          | GO:  | INTRACELLULAR PROTEIN TRANSPORT                                                                   | 0.00  | 0.01      |
|                                          | GO:  | VESICLE-MEDIATED TRANSPORT                                                                        | 0.01  | 0.13      |
| Translational Elongation                 | MPM: | LOCALIZATION OF AMINOACYL-TRNA LIGASES IN THE THREE PROTEIN TRANSLATIONAL COMPARTMENTS            | 0.04  | 0.20      |
|                                          | GO:  | TRANSLATIONAL ELONGATION                                                                          | 0.04  | 0.24      |
| Mitochondrial Processes                  | MPM: | NUCLEAR GENES WITH MITOCHONDRIAL SIGNAL SEQUENCES                                                 | 0.00  | 0.03      |
|                                          | MPM: | MITOCHONDRIAL ELECTRON FLOW                                                                       | 0.01  | 0.12      |
|                                          | MPM: | IMPORT OF PROTEINS INTO THE MITOCHONDRION                                                         | 0.05  | 0.24      |
| Cell cycle                               | GO:  | REGULATION OF CELL CYCLE PROCESS                                                                  | 0.00  | 0.09      |
| DOWNREGULATED PATHWAYS                   |      |                                                                                                   | p-val | FDR q-val |
| Invasion, Pathogenesis and Cytoadherence | MPM: | FUNCTIONAL ANNOTATION OF MEROZOITE INVASION-RELATED PROTEINS                                      | 0.00  | 0.00      |
|                                          | MPM: | SUBCELLULAR LOCALIZATION OF PROTEINS INVOLVED IN INVASION                                         | 0.00  | 0.00      |
|                                          | MPM: | MEROZOITE LIGANDS THEIR ERYTHROCYTE RECEPTORS                                                     | 0.01  | 0.08      |
|                                          | MPM: | PROTEIN-PROTEIN INTERACTIONS BETWEEN HUMAN ERYTHROCYTES AND PLASMODIUM FALCIPARUM                 | 0.00  | 0.01      |
|                                          | MPM: | INTERACTIONS BETWEEN MODIFIED HOST CELL MEMBRANE AND ENDOTHELIAL CELL                             | 0.00  | 0.00      |
|                                          | MPM: | <i>Pfemp1</i> DOMAIN ARCHITECTURES                                                                | 0.00  | 0.00      |
|                                          | MPM: | ROSETTE FORMATION BETWEEN NORMAL AND INFECTED RBC                                                 | 0.00  | 0.00      |
|                                          | GO:  | CELL-CELL ADHESION                                                                                | 0.00  | 0.00      |
|                                          | GO:  | CYTOADHERENCE TO MICROVASCULATURE MEDIATED BY SYMBIONT PROTEIN                                    | 0.00  | 0.00      |
|                                          | GO:  | MODULATION BY SYMBIONT OF HOST ERYTHROCYTE AGGREGATION                                            | 0.00  | 0.00      |
|                                          | GO:  | PATHOGENESIS                                                                                      | 0.00  | 0.00      |
|                                          | GO:  | ANTIGENIC VARIATION                                                                               | 0.00  | 0.00      |
| Chromatin Modification                   | MPM: | PEPTIDES WITH CONFIRMED METHYLATED LYSINE RESIDUES                                                | 0.00  | 0.01      |
|                                          | MPM: | CHAPERONE-MEDIATED MODULATION OF NUCLEOSOME-HISTONE INTERACTIONS                                  | 0.03  | 0.12      |
| Transcription                            | GO:  | RNA METABOLIC PROCESS                                                                             | 0.03  | 0.14      |
|                                          | GO:  | REGULATION OF TRANSCRIPTION DNA-DEPENDENT                                                         | 0.05  | 0.16      |
| Translation Initiation                   | MPM: | MATURATION AND EXPORT OF 60S AND 40S RIBOSOMAL SUBUNITS                                           | 0.03  | 0.10      |
|                                          | MPM: | RIBOSOMAL PARTICLES ALONG THE 60S ASSEMBLY PATHWAY                                                | 0.04  | 0.16      |
| Motor activity                           | GO:  | ACTIN BINDING                                                                                     | 0.00  | 0.01      |
|                                          | GO:  | MOTOR ACTIVITY                                                                                    | 0.00  | 0.01      |
| Phosphorylation                          | MPM: | PROTEIN PHOSPHORYLATION                                                                           | 0.01  | 0.04      |
|                                          | MPM: | THE PHOSPHOPROTEOME OF PLASMODIUM FALCIPARUM INFECTED RBCS                                        | 0.00  | 0.00      |
|                                          | MPM: | PROTEIN KINASE CODING GENES                                                                       | 0.00  | 0.00      |
| Cell cycle                               | MPM: | PROTEINS PREDICTED TO BE INVOLVED IN CELL CYCLE REGULATORY NETWORK                                | 0.03  | 0.10      |

**Table B**

| UPREGULATED PATHWAYS                  |      |                                                                                                   | p-val | FDR q-val |
|---------------------------------------|------|---------------------------------------------------------------------------------------------------|-------|-----------|
| Protein Turnover                      | GO:  | UBIQUITIN-DEPENDENT PROTEIN CATABOLIC PROCESS                                                     | 0.03  | 0.15      |
|                                       | MPM: | GENERAL ROLES OF DEUBIQUITINASES                                                                  | 0.04  | 0.21      |
|                                       | MPM: | GENES CODING FOR COMPONENTS OF THE PROTEASOME DEGRADATION MACHINERY AND THEIR TIMED TRANSCRIPTION | 0.05  | 0.20      |
| Oxidative stress                      | MPM: | GLUTATHIONYLATED PROTEINS                                                                         | 0.00  | 0.06      |
| Translation Initiation                | MPM: | INITIATION OF TRANSLATION                                                                         | 0.00  | 0.00      |
|                                       | GO:  | TRANSLATION                                                                                       | 0.00  | 0.03      |
|                                       | GO:  | TRANSLATIONAL INITIATION                                                                          | 0.01  | 0.10      |
|                                       | GO:  | TRANSLATION INITIATION FACTOR ACTIVITY                                                            | 0.01  | 0.04      |
|                                       | MPM: | RIBOSOMAL STRUCTURE                                                                               | 0.00  | 0.00      |
|                                       | MPM: | ORGANELLAR RIBOSOME ASSEMBLY PROTEINS AND THEIR PREDICTED TARGETING                               | 0.00  | 0.03      |
|                                       | MPM: | GENES CODING FOR COMPONENTS INVOLVED IN RIBOSOME ASSEMBLY                                         | 0.01  | 0.06      |
|                                       | GO:  | STRUCTURAL CONSTITUENT OF RIBOSOME                                                                | 0.00  | 0.06      |
| Transcription                         | MPM: | MATURATION AND EXPORT OF 60S AND 40S RIBOSOMAL SUBUNITS                                           | 0.05  | 0.20      |
|                                       | MPM: | TRANSCRIPTION ASSOCIATED PROTEINS IMPLICATED IN THE TRANSCRIPTIONAL MACHINERY                     | 0.04  | 0.16      |
|                                       | MPM: | DNA BINDING PROTEINS WITH AP2 DOMAIN-S-                                                           | 0.04  | 0.17      |
|                                       | MPM: | TRANSCRIPTION RELATED PROTEINS ENCODING GENES                                                     | 0.03  | 0.14      |
|                                       | MPM: | MRNA-BINDING PROTEINS IN TROPHOZOITE AND SCHIZONTS                                                | 0.00  | 0.01      |
| Chromatin Modification                | MPM: | PREDICTED PROTEIN-PROTEIN INTERACTIONS OF PLAUSIBLE STRESS HELICASES                              | 0.01  | 0.04      |
|                                       | MPM: | ENCODED PROTEINS THAT COULD BE CONSTITUENTS OF P-BODIES                                           | 0.05  | 0.22      |
|                                       | MPM: | PROTEINS CONTAINING HISTONE POST TRANSLATIONAL MODIFICATION-BINDING MODULES                       | 0.00  | 0.01      |
|                                       | MPM: | HISTONE CHAPERONES                                                                                | 0.00  | 0.04      |
| Phospholipid metabolism               | MPM: | CHROMATIN MODIFYING PROTEINS                                                                      | 0.02  | 0.14      |
|                                       | MPM: | INTERACTOME OF THE SER-THR PROTEIN PHOSPHATASE TYPE 1                                             | 0.02  | 0.14      |
| Transport through the nucleus         | MPM: | UTILIZATION OF PHOSPHOLIPIDS                                                                      | 0.02  | 0.14      |
|                                       | MPM: | FATTY ACIDS ELONGATION IN THE ENDOPLASMIC RETICULUM                                               | 0.03  | 0.19      |
| Exported proteins                     | MPM: | IMPORT AND EXPORT THROUGH THE NUCLEAR PORE                                                        | 0.00  | 0.00      |
|                                       | MPM: | KARYOPHERIN-EXPORTIN-MEDIATED NUCLEAR EXPORT PATHWAYS                                             | 0.00  | 0.03      |
| Autophagy                             | MPM: | PARASITE ENCODED PROTEINS ASSOCIATED WITH THE MEMBRANE OF INFECTED ERYTHROCYTES                   | 0.00  | 0.01      |
|                                       | MPM: | EXPORTED PROTEINS OF PLASMODIUM FALCIPARUM WITH CONFIRMED LOCATION                                | 0.01  | 0.05      |
|                                       | MPM: | PROTEINS OF THE PARASITOPHOUS VACUOLAR MEMBRANE                                                   | 0.02  | 0.11      |
|                                       | MPM: | CHARACTERISTICS OF PLASMODIUM FALCIPARUM EXPORT PROTEINS THAT REMODEL INFECTED ERYTHROCYTE        | 0.02  | 0.11      |
| Others                                | MPM: | AUTOPHAGY AND AUTOPHAGY-RELATED PATHWAYS                                                          | 0.00  | 0.03      |
|                                       | MPM: | THE ATG AUTOPHAGIC PATHWAY                                                                        | 0.00  | 0.04      |
| Invasion, Pathogenesis, Cytoadherence | MPM: | PHOSPHOPROTEOME OF THE MEROZOITE                                                                  | 0.00  | 0.00      |
|                                       | MPM: | PROTEIN KINASE G-DEPENDENT PHOSPHORYLATION IN SCHIZONTS                                           | 0.04  | 0.15      |
|                                       | MPM: | DIFFERENTIAL PROTEOME ANALYSIS UNDER DRUG TREATMENT                                               | 0.01  | 0.13      |
|                                       | MPM: | S-NITROSYLATED PROTEINS                                                                           | 0.00  | 0.00      |
| DOWNREGULATED PATHWAYS                |      |                                                                                                   | p-val | FDR q-val |
| Invasion, Pathogenesis, Cytoadherence | MPM: | INTERACTIONS BETWEEN MODIFIED HOST CELL MEMBRANE AND ENDOTHELIAL CELL                             | 0.00  | 0.00      |
|                                       | MPM: | ROSETTE FORMATION BETWEEN NORMAL AND INFECTED RBC                                                 | 0.00  | 0.00      |
|                                       | MPM: | <i>Pfemp1</i> DOMAIN ARCHITECTURES                                                                | 0.00  | 0.01      |
|                                       | GO:  | ANTIGENIC VARIATION                                                                               | 0.00  | 0.00      |
|                                       | GO:  | CYTOADHERENCE TO MICROVASCULATURE MEDIATED BY SYMBIONT PROTEIN                                    | 0.00  | 0.00      |
|                                       | GO:  | CELL-CELL ADHESION                                                                                | 0.01  | 0.09      |
|                                       | GO:  | PATHOGENESIS                                                                                      | 0.00  | 0.09      |
| Transport                             | MPM: | GLYCOSYLPHOSPHATIDYLINOSITOL -GPI- ANCHOR BIOSYNTHESIS                                            | 0.01  | 0.09      |
| Transcription                         | MPM: | SUBCELLULAR LOCATION OF ADAPTOR PROTEINS                                                          | 0.00  | 0.12      |
| Translation elongation                | MPM: | RNA POLYMERASE II TRANSCRIBES MRNA                                                                | 0.02  | 0.17      |
| Hemoglobin digestion                  | GO:  | TRANSLATION ELONGATION FACTOR ACTIVITY                                                            | 0.03  | 0.19      |
| ATP synthesis                         | MPM: | HEMOGLOBIN DIGESTION                                                                              | 0.01  | 0.08      |
|                                       | MPM: | ATP SYNTHASE COMPLEX                                                                              | 0.04  | 0.24      |
